# Supplementary material for: Characterization of Canine Influenza Virus A (H3N2) Circulating in Dogs in China from 2016 to 2018
Source: MDPI journal article supplement (doi:10.3390/v13112279), 2021-11-15
Supplement: s1 [file s1]

Supplementary Materials

# Characterization of Canine Influenza Virus A (H3N2) Circulating in Dogs in China from 2016 to 2018

**Table S1.** Primer of 8 non-coding regions gene fragment sequence of H3N2 CIV.

| Primers | Sequences (3'–5')                                                                |
|---------|----------------------------------------------------------------------------------|
| PB2     | F:TAAGAGATCTAATGTCGCAGTC<br>R:TGTCAGTAAGTATGCTAGAG                               |
| PB1     | F:GTCATCCGACTTTACTTTTCTTGAAGTGCC<br>R:GGAGTTTTTTCATGAAGGACAAGCT'                 |
| PA      | F:GCTTCAATCCAATGATTGTCGAGCTTG<br>R:GTAGCATTGCCACAACATTTTCAGTGCATG                |
| HA      | F:GCAAAAGCAGGGGATACTTTCATTAATCAT<br>R:CACATAATGAAACCCAGCAAGACAACA                |
| NP      | F:AACGATCGTATGAACAGATGGAAACTG'<br>R:TCTTCTGCATTGTCTCCGAAGAAATAGGAT               |
| NA      | F:TAATAGCAATAGGGTCTGTCTCTCTAGCCAT<br>R:TATAGGCATGAAGTTAATATTCGCCCCATC            |
| M       | F:TATTGAAAGATGAGTCTTCTAACCAGAGGTC<br>R:GGTAGTTTTTACTCCAGCTCTATGTTGAC             |
| NS      | F:AACATAATGGACTCCAACACTGTGTCAAG<br>R:AGCTGAAACGAGAAAGTTCTTATCTCTTGC <sup>1</sup> |

<sup>1</sup>The primers included an outer forward primer (F), an outer backward primer (R).

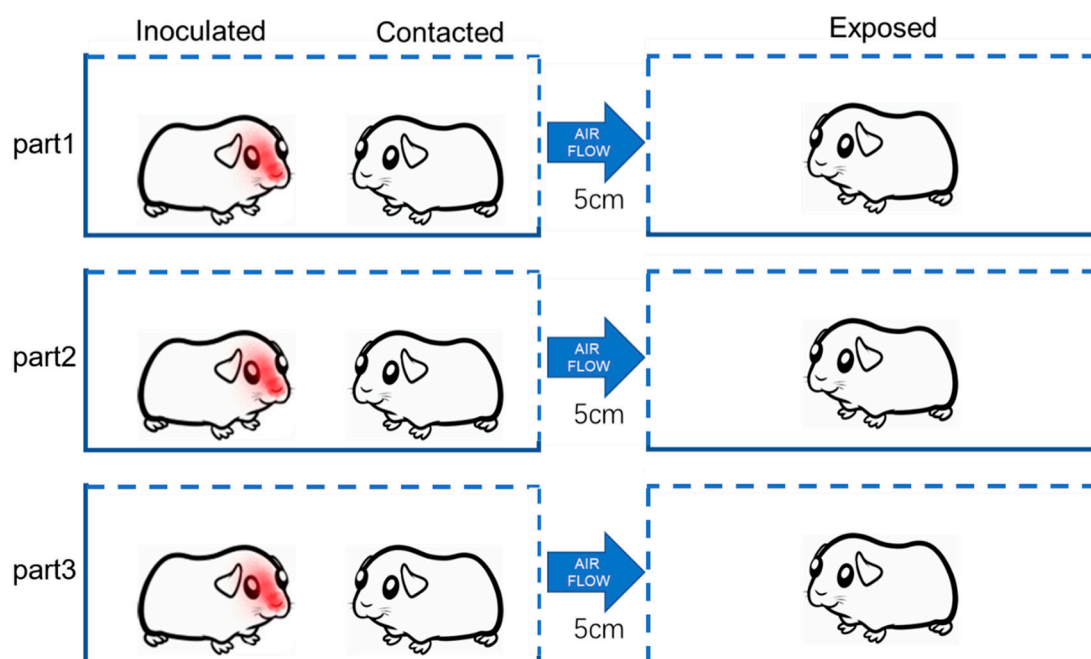

**Figure S1.** Diagram of H3N2 CIV infection in guinea pigs. Three animals were inoculated with  $2 \times 10^6$  EID<sub>50</sub> of H3N2 CIV. At 24 h p.i., each of these animals was placed in a cage with one uninfected guinea pig. Another one uninfected guinea pig was placed in a nearby cage (5cm apart). Arrows indicate the direction of air flow. Cage layouts are shown in Diagram. Nasal washes were collected once daily, beginning on day 2 p.i. (1 day post-exposure).

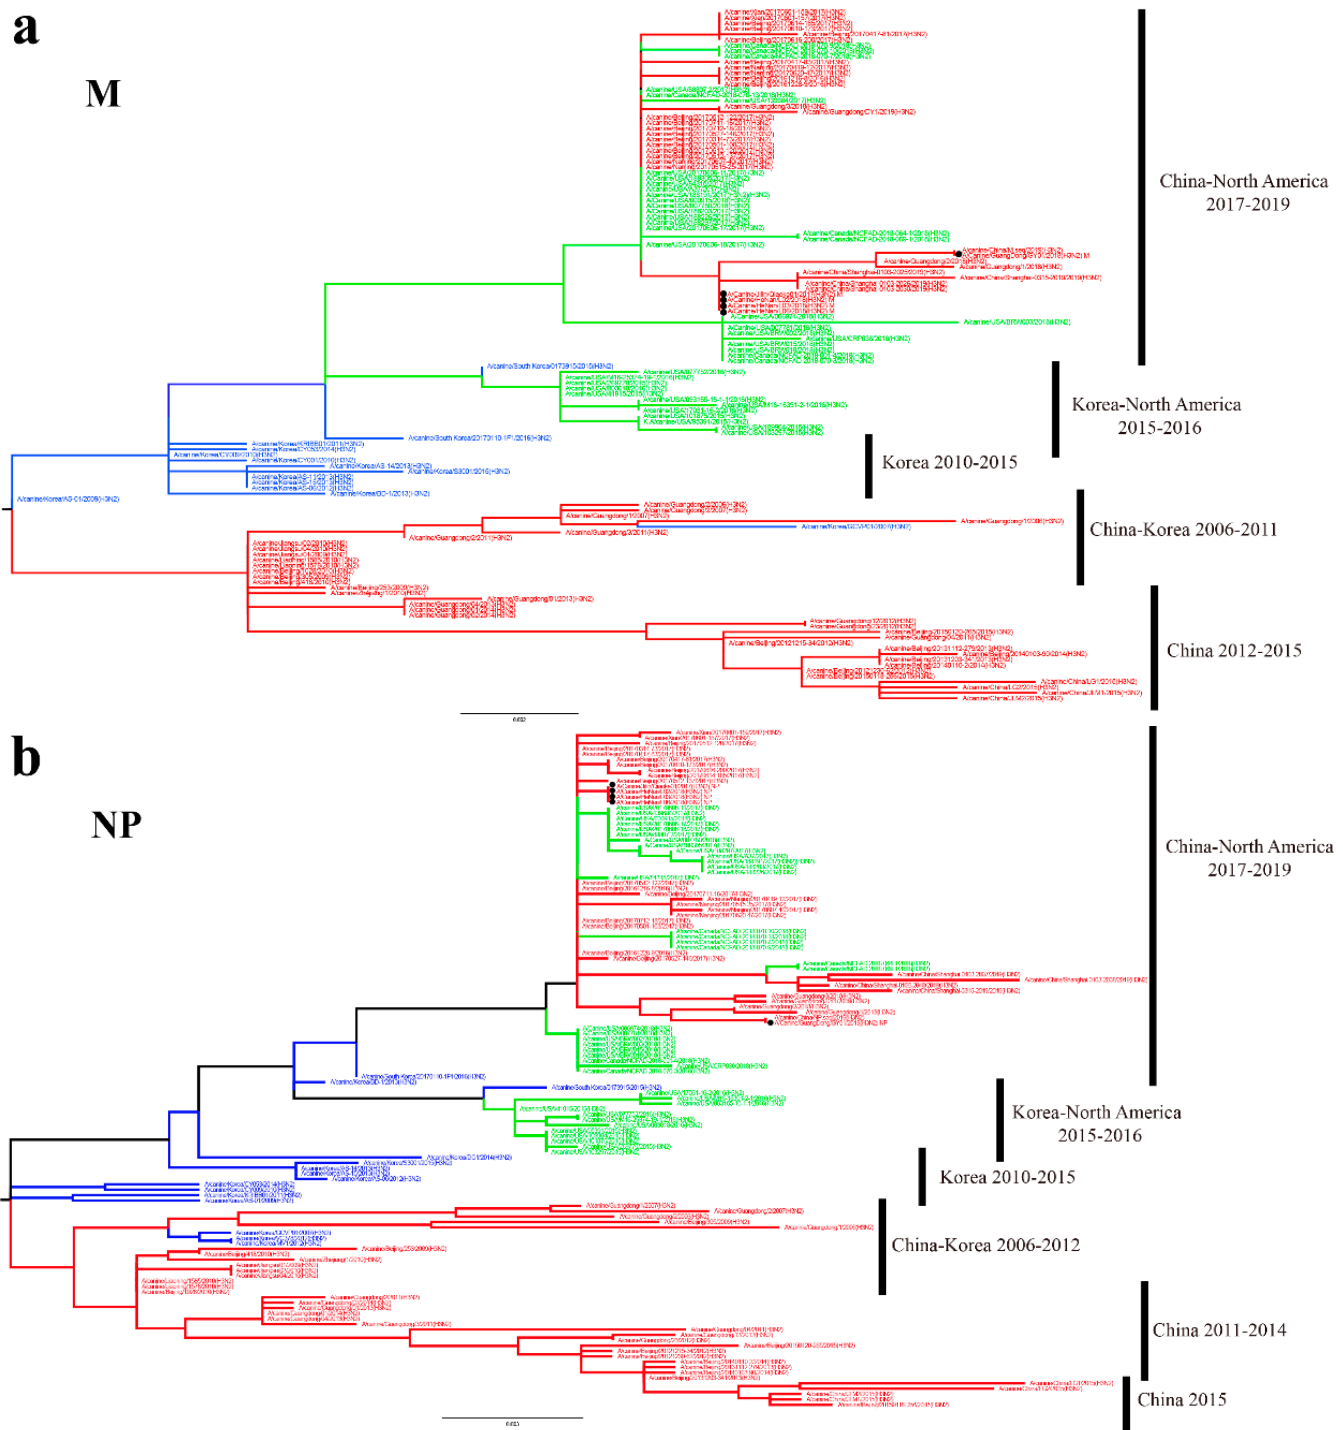

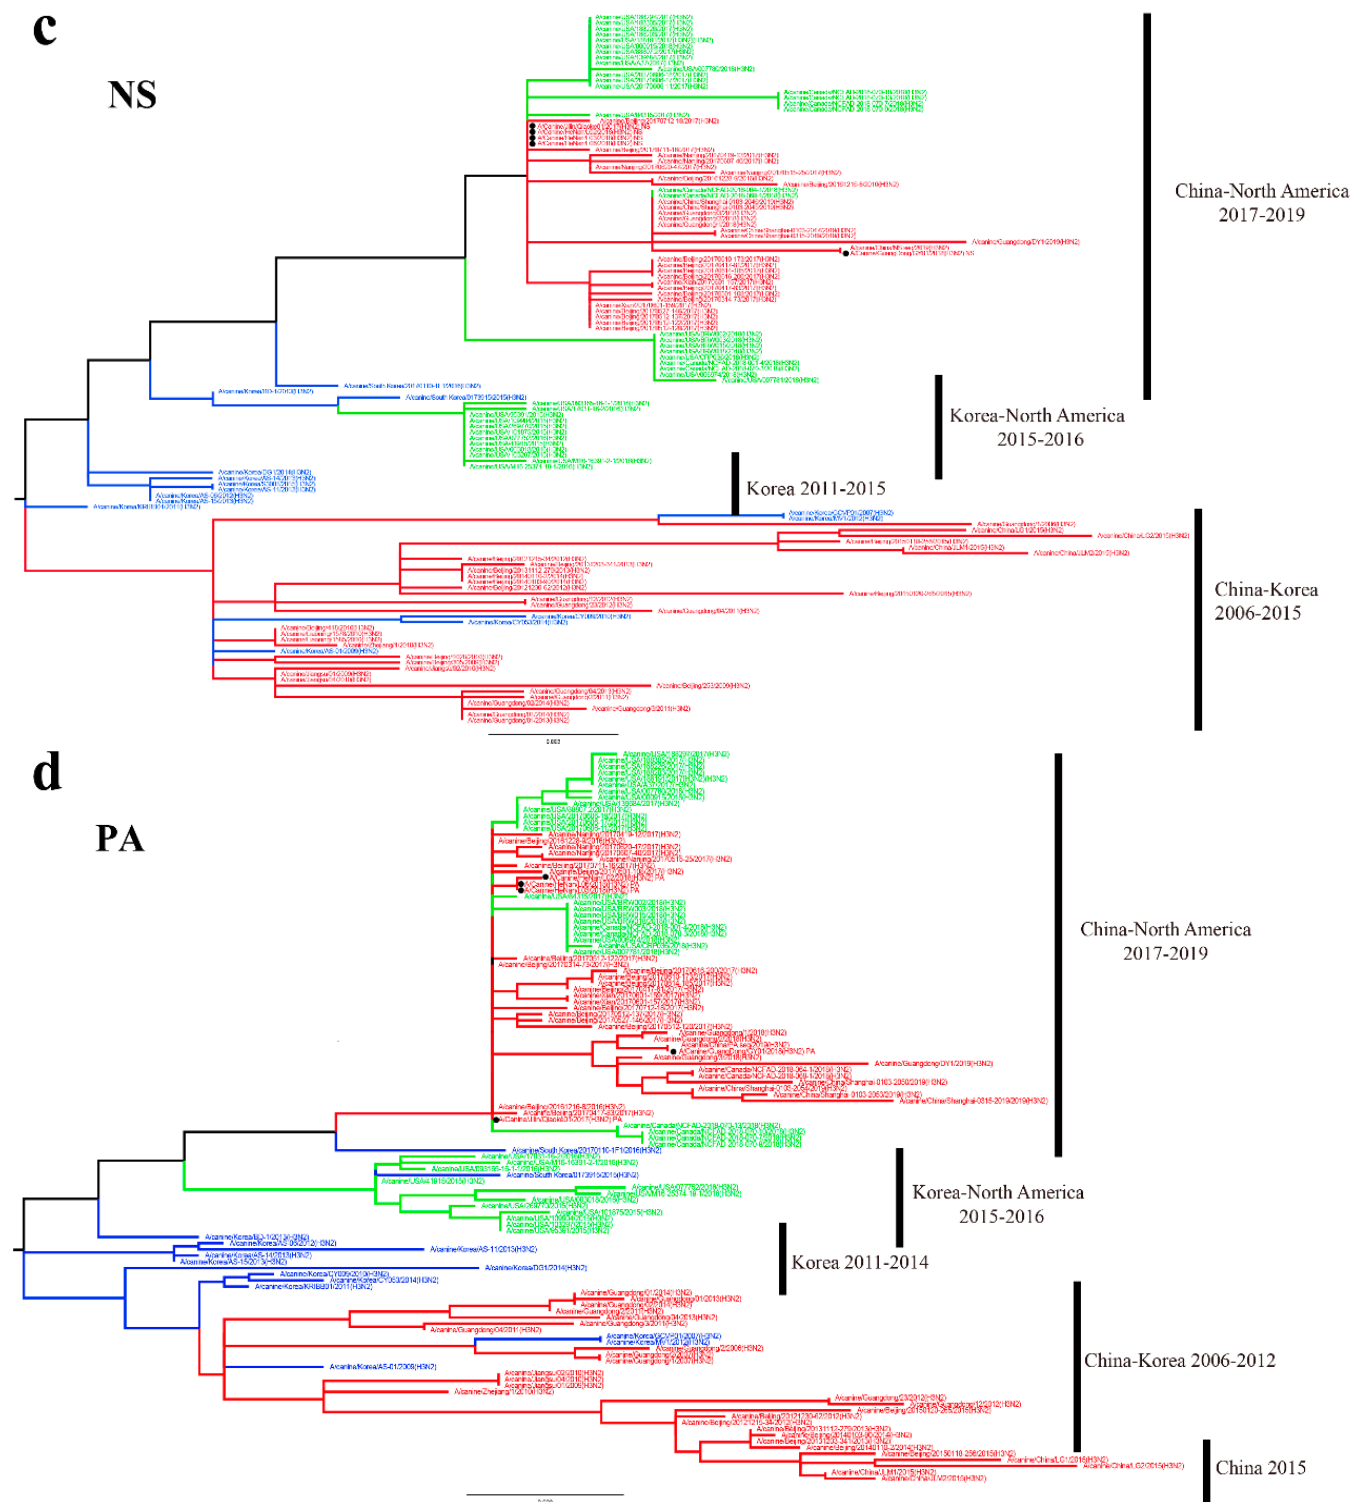

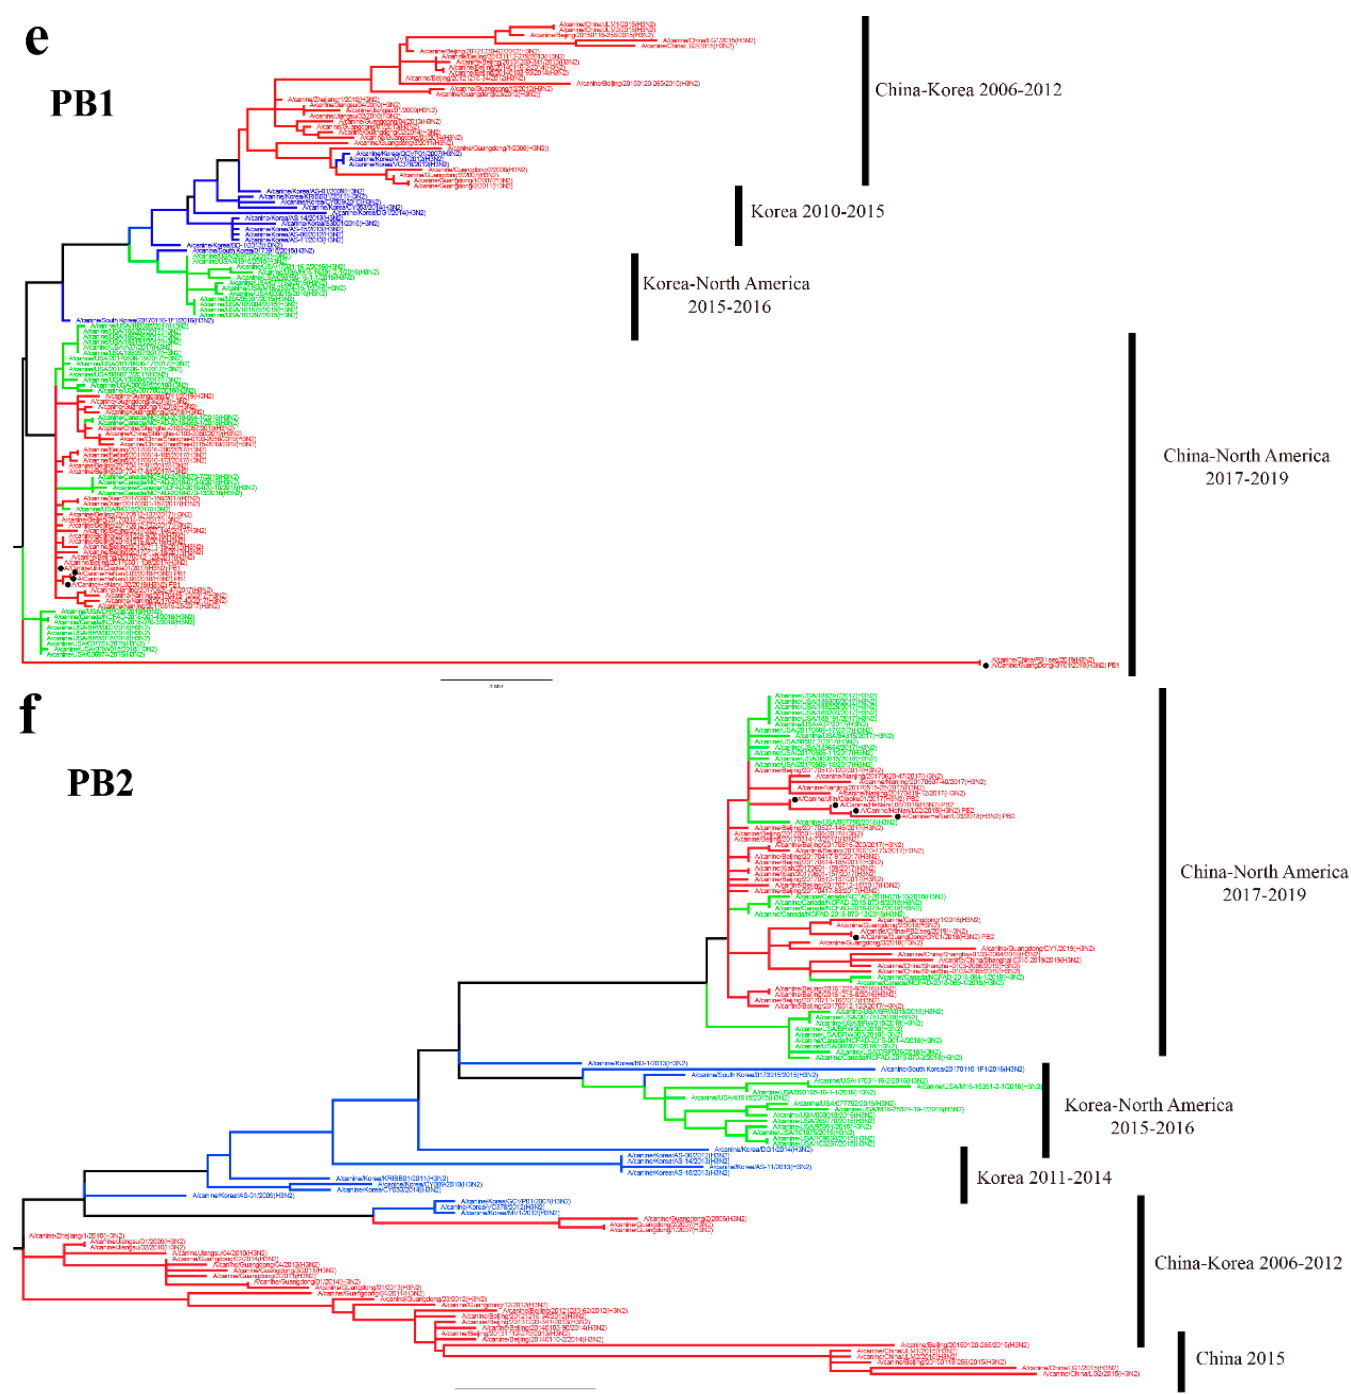

**Figure S2.** Phylogenetic tree of H3N2 CIV internal sequences. Phylogenetic trees based on the nucleotide sequences of M (a), NP (b), NS (c), PA (d), PB1 (e), PB2 (f) genes. In all the trees, green branches on the phylogenies represent viruses isolated in North America, red branches represent those isolated in China, and blue branches represent those isolated in South Korea. The black circle represents the strains in this study.
